# Supplementary material
Source: MDPI journal article supplement (https://www.mdpi.com/2079-6412/11/8/930)
Supplement: s1 [file s1]

# **A Numerical Investigation on the Combined Effects of MoSe<sub>2</sub> Interface Layer and Graded Bandgap Absorber in CIGS Thin Film Solar Cells**

**Fazliyana 'Izzati Za'abar<sup>1,\*</sup>, Yulisa Yusoff<sup>2,\*</sup>, Hassan Mohamed<sup>2,\*</sup>, Siti Fazlili Abdullah<sup>3</sup>, Ahmad Wafi Mahmood Zuhdi<sup>2</sup>, Nowshad Amin<sup>2</sup>, Puvaneswaran Chelvanathan<sup>4,5</sup>, Mohd. Shaparuddin Bahrudin<sup>1</sup>, Kazi Sajedur Rahman<sup>4</sup>, Nurul Asma Samsudin<sup>2</sup> and Wan Syakirah Wan Abdullah<sup>6</sup>**

<sup>1</sup> UNITEN R&D Sdn. Bhd., Universiti Tenaga Nasional (UNITEN), Kajang 43000, Selangor, Malaysia; shaparuddin@uniten.edu.my

<sup>2</sup> Institute of Sustainable Energy, Universiti Tenaga Nasional (UNITEN), Kajang 43000, Selangor, Malaysia; wafi@uniten.edu.my (A.W.M.Z.); nowshad@uniten.edu.my (N.A.); nurul.asma@uniten.edu.my (N.A.S.)

<sup>3</sup> College of Engineering, Universiti Tenaga Nasional (UNITEN), Kajang 43000, Selangor, Malaysia; siti@uniten.edu.my

<sup>4</sup> Solar Energy Research Institute (SERI), Universiti Kebangsaan Malaysia (UKM), Bangi 43600, Selangor, Malaysia; cpuvaneswaran@ukm.edu.my (P.C.); sajed@ukm.edu.my (K.S.R.)

<sup>5</sup> Graphene & Advanced 2D Materials Research Group (GAMRG), School of Science and Technology (SST), Sunway University, No. 5, Jalan Universiti, Bandar Sunway 47500, Selangor, Malaysia

<sup>6</sup> TNB Renewables Sdn. Bhd. (TRe), Level 31, PJX-HM Shah Tower, 16A Persiaran Barat, Petaling Jaya 46050, Selangor, Malaysia; syakirahwa@tnb.com.my

\* Correspondence: fazliyana@uniten.edu.my (F.I.Z.); yulisa.yusoff@uniten.edu.my (Y.Y.); mhassan@uniten.edu.my (H.M.)

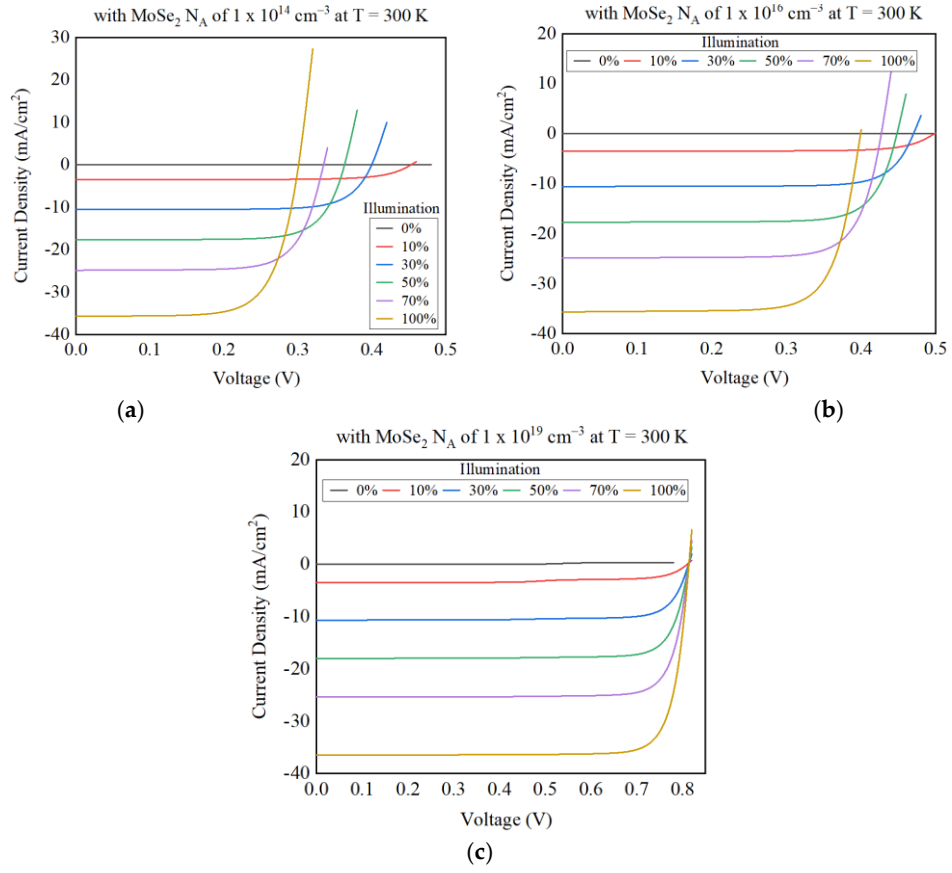

**Figure S1.** Measured J–V curves with different illumination values. Plots (a–c) correspond to the simulated CIGS device with carrier concentration of  $\text{MoSe}_2$  interfacial layer of  $1.0 \times 10^{14}$ ,  $1.0 \times 10^{16}$ , and  $1.0 \times 10^{19}$   $\text{cm}^{-3}$ , respectively, at  $T = 300$  K.

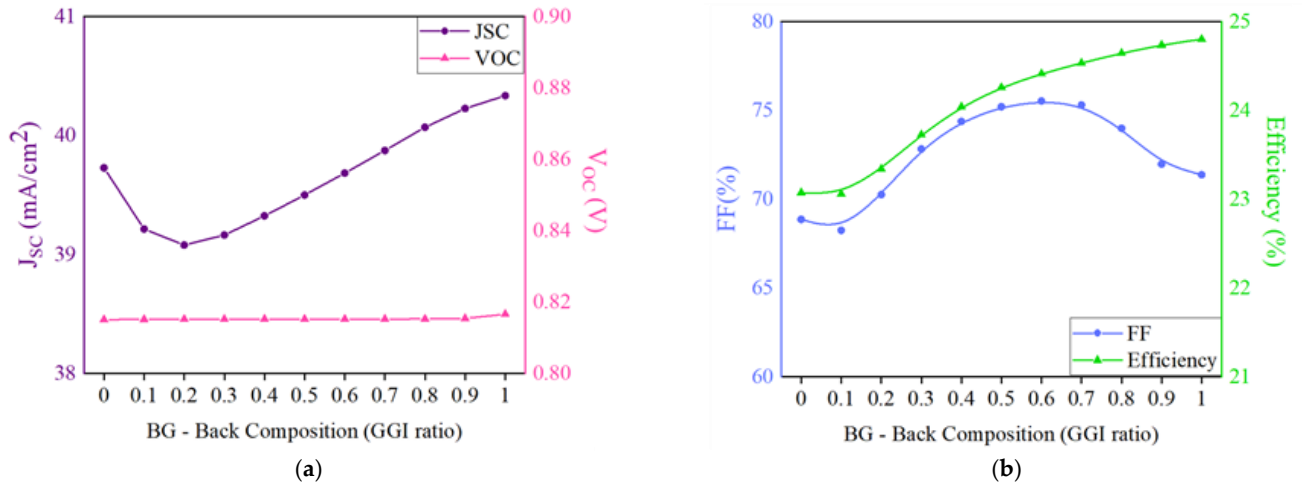

**Figure S2.** Electrical parameters as a function of back (CIGS/ $\text{MoSe}_2$  interface) composition ranging from 0 to 1 for BG structure (a)  $J_{sc}$  and  $V_{oc}$  (b) FF and conversion efficiency (PCE).

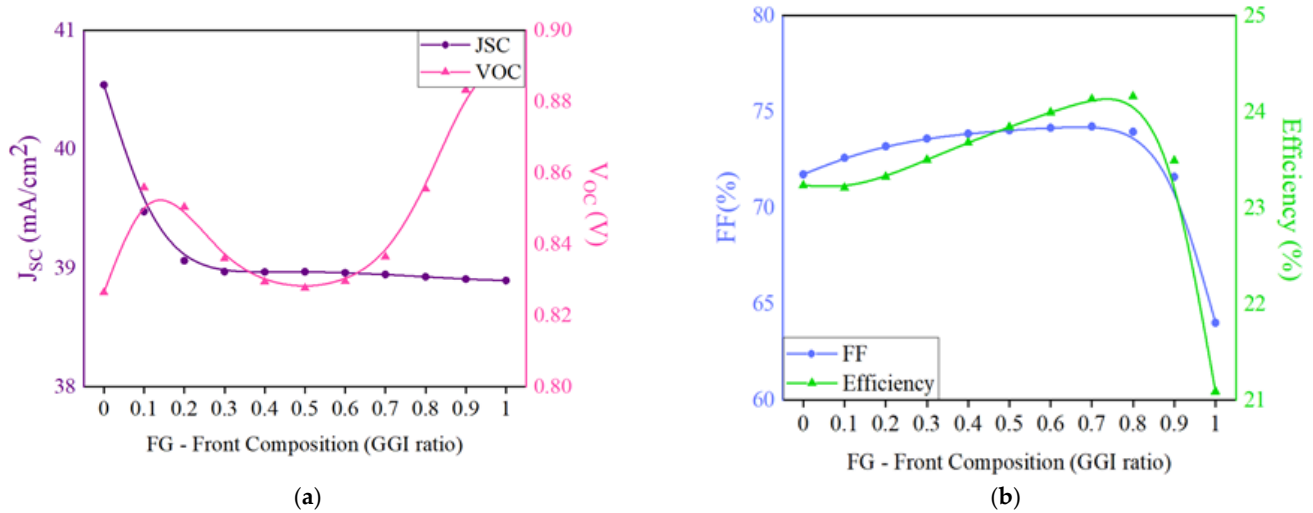

**Figure S3.** Electrical parameters as a function of front (CdS/CIGS interface) composition ranging from 0 to 1 for FG structure (a)  $J_{sc}$  and  $V_{oc}$  (b) FF and conversion efficiency (PCE).

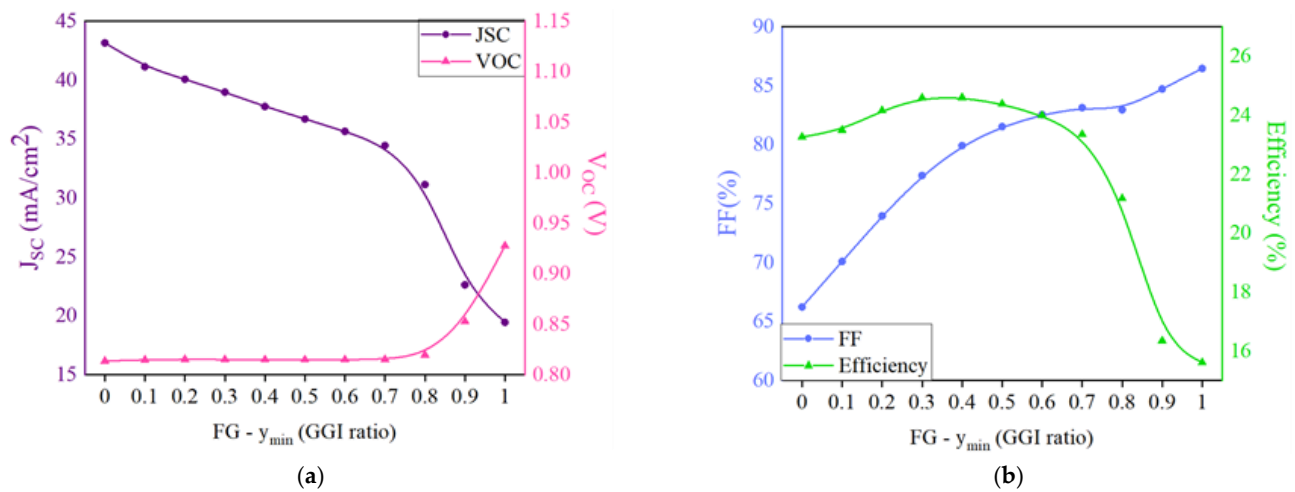

**Figure S4.** Electrical parameters as a function of as a function of lowest composition value ( $y_{min}$ ) in the bulk region of CIGS absorber layer for FG bandgap profile (a)  $J_{sc}$  and  $V_{oc}$  (b) FF and conversion efficiency (PCE).
